# Supplementary material
Source: PubMed Central journal article supplement (PMC3891117)
Supplement: JZUSB15-0043TS1.pdf [file JZUSB15-0043TS1.pdf]

**Table S1 Summary of *PITX2* intragenic mutations**

| Nucleotide change     | Predicted protein change | Exon | Domain     | Reference                             |
|-----------------------|--------------------------|------|------------|---------------------------------------|
| c.47-1G>T             | Splice site              | IVS4 |            | (Maciolek <i>et al.</i> , 2006)       |
| c.47-1G>C             | Splice site              | IVS4 |            | (Perveen <i>et al.</i> , 2000)        |
| c.114del              | p.Q39Kfs*116             | 5    |            | (Strungaru <i>et al.</i> , 2007)      |
| c.127C>T              | p. R43W                  | 5    | HD         | (Idrees <i>et al.</i> , 2006)         |
| c.134dupA             | p.H45Qfs*154             | 5    | HD         | (Reis <i>et al.</i> , 2012)           |
| c.134_137del          | p.H45Lfs*109             | 5    | HD         | (Wang <i>et al.</i> , 2003)           |
| c.137_138del          | p.F46Yfs*152             | 5    | HD         | (D'haene <i>et al.</i> , 2011)        |
| c.143_144del          | p.S48Tfs*150             | 5    | HD         | (Reis, <i>et al.</i> , 2012)          |
| c.151_171dup          | p.F58Lfs*222             | 5    | HD         | (Priston <i>et al.</i> , 2001)        |
| c.160-252_253-734del  | p.L55Qfs*46              | 5-6  | HD and OAR | (De La Houssaye <i>et al.</i> , 2006) |
| c.161T>A              | p.L54Q                   | 5    | HD         | (Semina <i>et al.</i> , 1996)         |
| c.163G>T              | p.E55*                   | 5    | HD         | (Vieira <i>et al.</i> , 2006)         |
| c.172T>C              | p.F58L                   | 5    | HD         | (D'haene, <i>et al.</i> , 2011)       |
| c.174C>G              | p. F58L                  | 5    | HD         | (Vieira, <i>et al.</i> , 2006)        |
| c.175C>T              | p.Q59*                   | 5    | HD         | (D'haene, <i>et al.</i> , 2011)       |
| c.185G>A              | P.R62H                   | 5    | HD         | (Amendt <i>et al.</i> , 2000)         |
| c.191C>G              | p.P64R                   | 5    | HD         | (Weisschuh <i>et al.</i> , 2006)      |
| c.191C>T              | p.P64L                   | 5    | HD         | (Phillips, 2002)                      |
| c.198_201delinsTTTCT  | p.M66Ifs*133             | 5    | HD         | This study                            |
| c.199C>T <sup>a</sup> | p.Q67*                   | 5    | HD         | (Law <i>et al.</i> , 2011)            |
| c.202A>C              | p.T68P                   | 5    | HD         | (Semina, <i>et al.</i> , 1996)        |
| c.206G>A              | P.R69H                   | 5    | HD         | (Kulak <i>et al.</i> , 1998)          |
| c.224G>A              | p.W75*                   | 5    | HD         | (D'haene, <i>et al.</i> , 2011)       |
| c.225G>A              | p.W75*                   | 5    | HD         | (Reis, <i>et al.</i> , 2012)          |
| c.247G>C              | p.V83L                   | 5    | HD         | (Priston, <i>et al.</i> , 2001)       |
| c.250C>T              | p.R84W                   | 5    | HD         | (Alward <i>et al.</i> , 1998)         |
| c.252+5G>C            | Splice site              | IVS5 |            | (Semina, <i>et al.</i> , 1996)        |
| c.253-11A>G           | Splice site              | IVS5 |            | (Semina, <i>et al.</i> , 1996)        |
| c.253-2A>T            | Splice site              | IVS5 |            | (Doward <i>et al.</i> , 1999)         |
| c.253-1G>A            | Splice site              | IVS5 |            | (Reis, <i>et al.</i> , 2012)          |
| c.257G>C              | p.W86S                   | 6    | HD         | (Reis, <i>et al.</i> , 2012)          |
| c.258G>T              | P.W86C                   | 6    | HD         | (Li <i>et al.</i> , 2008)             |
| c.262A>G              | p.K88E                   | 6    | HD         | (Perveen, <i>et al.</i> , 2000)       |
| c.268C>T              | p.R90C                   | 6    | HD         | (Perveen, <i>et al.</i> , 2000)       |
| c.269G>C              | p.R90P                   | 6    | HD         | (Phillips, 2002)                      |
| c.272G>C              | p.R91P                   | 6    | HD         | (Semina, <i>et al.</i> , 1996)        |
| c.282G>A              | p.W94*                   | 6    | HD         | (Amendt, <i>et al.</i> , 2000)        |
| c.286_287del          | p.K96Efs*102             | 6    | HD         | (Perveen, <i>et al.</i> , 2000)       |
| c.289_290del          | p.R97Gfs*101             | 6    | HD         | (D'haene, <i>et al.</i> , 2011)       |
| c.301C>T              | p.Q101*                  | 6    |            | (D'haene, <i>et al.</i> , 2011)       |
| c.304C>T              | p.Q102*                  | 6    |            | (D'haene, <i>et al.</i> , 2011)       |
| c.313C>G              | p.L105V                  | 6    |            | (Phillips, 2002)                      |
| c.323A>C              | p.N108T                  | 6    |            | (Phillips, 2002)                      |
| c.356del              | p.Q119Rfs*36             | 6    |            | (Perveen, <i>et al.</i> , 2000)       |
| c.363C>A              | p.Y121*                  | 6    |            | (Vieira, <i>et al.</i> , 2006)        |
| c.366del              | p.D122Efs*33             | 6    |            | (Saadi <i>et al.</i> , 2001)          |
| c.398G>A              | p.W133*                  | 6    |            | (Semina, <i>et al.</i> , 1996)        |
| c.410G>T              | p.G137V                  | 6    |            | (Kniestedt <i>et al.</i> , 2006)      |
| c.416del              | p.T139Nfs*16             | 6    |            | (Strungaru, <i>et al.</i> , 2007)     |
| c.500dup              | p.P168Tfs*31             | 6    |            | (Perveen, <i>et al.</i> , 2000)       |
| c.652_653delinsAAG    | p.Y218Qfs*11             | 6    |            | (Perveen, <i>et al.</i> , 2000)       |
| c.662_669dup          | p.P224Rfs*18             | 6    |            | (Vieira, <i>et al.</i> , 2006)        |
| c.679del              | p.Y227Mfs*12             | 6    |            | (Brooks <i>et al.</i> , 2004)         |
| c.690del              | p.C231Vfs*8              | 6    |            | (Borges <i>et al.</i> , 2002)         |
| c.698C>T              | p.S233L                  | 6    | OAR        | (Kelberman <i>et al.</i> , 2011)      |
| c.708_730del          | p.S237Afs*48             | 6    | OAR        | (Reis, <i>et al.</i> , 2012)          |

<sup>a</sup> Numbering is relative to the coding DNA sequence of *PITX2B* (NM\_153426), others are relative to the coding DNA sequence of *PITX2A* (NM\_153427.1), where nucleotide +1 is the A of the ATG translation initiation codon. Mutation is named according to the HGVS Mutation Nomenclature Recommendations (<http://www.hgvs.org/mutnomen/recs.html>) provided in the public domain by the Human Genome Variation Society). HD, homeodomain; OAR, OAR domain

## References

- Alward, W.L., Semina, E.V., Kalenak, J.W., Heon, E., Sheth, B.P., Stone, E.M., Murray, J.C., 1998. Autosomal dominant iris hypoplasia is caused by a mutation in the rieger syndrome (*rieg/pitx2*) gene, *Am J Ophthalmol.***125**(1):98-100.
- Amendt, B.A., Semina, E.V., Alward, W.L., 2000. Rieger syndrome: A clinical, molecular, and biochemical analysis, *Cell Mol Life Sci.***57**(11):1652-1666.
- Borges, A.S., Susanna, R., Jr., Carani, J.C., Betinjane, A.J., Alward, W.L., Stone, E.M., Sheffield, V.C., Nishimura, D.Y., 2002. Genetic analysis of *pitx2* and *foxc1* in rieger syndrome patients from brazil, *J Glaucoma.***11**(1):51-56.
- Brooks, B.P., Moroi, S.E., Downs, C.A., Wiltse, S., Othman, M.I., Semina, E.V., Richards, J.E., 2004. A novel mutation in the *pitx2* gene in a family with axenfeld-rieger syndrome, *Ophthalmic Genet.***25**(1):57-62.
- D'haene, B., Meire, F., Claerhout, I., Kroes, H.Y., Plomp, A., Arens, Y.H., De Ravel, T., Casteels, I., De Jaegere, S., Hooghe, S., et al., 2011. Expanding the spectrum of *foxc1* and *pitx2* mutations and copy number changes in patients with anterior segment malformations, *Invest Ophthalmol Vis Sci.***52**(1):324-333. [doi:10.1167/iops.10-5309]
- De La Houssaye, G., Bieche, I., Roche, O., Vieira, V., Laurendeau, I., Arbogast, L., Zeghidi, H., Rapp, P., Halimi, P., Vidaud, M., et al., 2006. Identification of the first intragenic deletion of the *pitx2* gene causing an axenfeld-rieger syndrome: Case report, *BMC Med Genet.***7**:82. [doi:10.1186/1471-2350-7-82]
- Doward, W., Perveen, R., Lloyd, I.C., Ridgway, A.E., Wilson, L., Black, G.C., 1999. A mutation in the *riegl* gene associated with peters' anomaly, *J Med Genet.***36**(2):152-155.
- Idrees, F., Vaideanu, D., Fraser, S.G., Sowden, J.C., Khaw, P.T., 2006. A review of anterior segment dysgeneses, *Surv Ophthalmol.***51**(3):213-231. [doi:10.1016/j.survophthal.2006.02.006]
- Kelberman, D., Islam, L., Holder, S.E., Jacques, T.S., Calvas, P., Hennekam, R.C., Nischal, K.K., Sowden, J.C., 2011. Digenic inheritance of mutations in *foxc1* and *pitx2*: Correlating transcription factor function and axenfeld-rieger disease severity, *Human Mutation.***32**(10):1144-1152. [doi:10.1002/humu.21550]
- Kniestedt, C., Taralczak, M., Thiel, M.A., Stuermer, J., Baumer, A., Gloor, B.P., 2006. A novel *pitx2* mutation and a polymorphism in a 5-generation family with axenfeld-rieger anomaly and coexisting fuchs' endothelial dystrophy, *Ophthalmology.***113**(10):1791 e1791-1798. [doi:10.1016/j.ophtha.2006.05.017]
- Kulak, S.C., Kozlowski, K., Semina, E.V., Pearce, W.G., Walter, M.A., 1998. Mutation in the *riegl* gene in patients with iridogoniodysgenesis syndrome, *Hum Mol Genet.***7**(7):1113-1117.
- Law, S.K., Sami, M., Piri, N., Coleman, A.L., Caprioli, J., 2011. Asymmetric phenotype of axenfeld-rieger anomaly and aniridia associated with a novel *pitx2* mutation, *Mol Vis.***17**:1231-1238.
- Li, D., Zhu, Q., Lin, H., Zhou, N., Qi, Y., 2008. A novel *pitx2* mutation in a chinese family with axenfeld-rieger syndrome, *Mol Vis.***14**:2205-2210.
- Maciolek, N.L., Alward, W.L., Murray, J.C., Semina, E.V., McNally, M.T., 2006. Analysis of rna splicing defects in *pitx2* mutants supports a gene dosage model of axenfeld-rieger syndrome, *BMC Med Genet.***7**:59. [doi:10.1186/1471-2350-7-59]
- Perveen, R., Lloyd, I.C., Clayton-Smith, J., Churchill, A., Van Heyningen, V., Hanson, I., Taylor, D., Mckeown, C., Super, M., Kerr, B., et al., 2000. Phenotypic variability and asymmetry of rieger syndrome associated with *pitx2* mutations, *Invest Ophthalmol Vis Sci.***41**(9):2456-2460.
- Phillips, J.C., 2002. Four novel mutations in the *pitx2* gene in patients with axenfeld-rieger syndrome, *Ophthalmic Res.***34**(5):324-326. [doi:65602]
- Priston, M., Kozlowski, K., Gill, D., Letwin, K., Buys, Y., Levin, A.V., Walter, M.A., Heon, E., 2001. Functional analyses of two newly identified *pitx2* mutants reveal a novel molecular mechanism for axenfeld-rieger syndrome, *Hum Mol Genet.***10**(16):1631-1638.
- Reis, L.M., Tyler, R.C., Volkmann Kloss, B.A., Schilter, K.F., Levin, A.V., Lowry, R.B., Zwijnenburg, P.J., Stroth, E., Broeckel, U., Murray, J.C., et al., 2012. *Pitx2* and *foxc1* spectrum of mutations in ocular syndromes, *Eur J Hum Genet.***20**(12):1224-1233. [doi:10.1038/ejhg.2012.80]
- Saadi, I., Semina, E.V., Amendt, B.A., Harris, D.J., Murphy, K.P., Murray, J.C., Russo, A.F., 2001. Identification of a dominant negative homeodomain mutation in rieger syndrome, *J Biol Chem.***276**(25):23034-23041. [doi:10.1074/jbc.M008592200]
- Semina, E.V., Reiter, R., Leysens, N.J., Alward, W.L., Small, K.W., Datson, N.A., Siegel-Bartelt, J., Bierke-Nelson, D., Bitoun, P., Zabel, B.U., et al., 1996. Cloning and characterization of a novel bicoid-related homeobox transcription factor gene, *rieg*, involved in rieger syndrome, *Nat Genet.***14**(4):392-399. [doi:10.1038/ng1296-392]
- Strungaru, M.H., Dinu, I., Walter, M.A., 2007. Genotype-phenotype correlations in axenfeld-rieger malformation and glaucoma patients with *foxc1* and *pitx2* mutations, *Investigative Ophthalmology & Visual Science.***48**(1):228-237. [doi:10.1167/iops.06-0472]
- Vieira, V., David, G., Roche, O., De La Houssaye, G., Boutboul, S., Arbogast, L., Kobetz, A., Orssaud, C., Camand, O., Schorderet, D.F., et al., 2006. Identification of four new *pitx2* gene mutations in patients with axenfeld-rieger syndrome, *Mol Vis.***12**:1448-1460.
- Wang, Y., Zhao, H., Zhang, X., Feng, H., 2003. Novel identification of a four-base-pair deletion mutation in *pitx2* in a rieger syndrome family, *J Dent Res.***82**(12):1008-1012.
- Weisschuh, N., Dressler, P., Schuettauf, F., Wolf, C., Wissinger, B., Gramer, E., 2006. Novel mutations of *foxc1* and *pitx2* in patients with axenfeld-rieger malformations, *Invest Ophthalmol Vis Sci.***47**(9):3846-3852. [doi:10.1167/iops.06-0343]
